# 1 Varying the position of phospholipid acyl chain unsaturation modulates 2 hopanoid and sterol ordering

3

4 **Authors: Nguyen Ha Ngoc Anh<sup>a</sup>, Liam Sharp<sup>b</sup>, Edward Lyman<sup>b</sup> and James P Saenz<sup>a\*</sup>**

5 <sup>a</sup> Technische Universität Dresden, B CUBE Center for Molecular Bioengineering, 01307 Dresden,  
6 Germany

7 <sup>b</sup> Department of Physics and Astronomy, University of Delaware, DE 19716, Newark, Delaware

8 \*corresponding author and lead contact: [james.saenz@tu-dresden.de](mailto:james.saenz@tu-dresden.de)

9

10

11

## 12 **ABSTRACT**

13

14 The cell membrane acts as a responsive interface between the cell and its surroundings. Ultimately,  
15 the diverse panel of lipids comprising the lipidome are employed to tune membrane biophysical  
16 properties for optimal function. For eukaryotes, a family of amphiphiles called sterols are crucial due  
17 to their unique capacity to modulate the order of membrane lipids. Bacteria typically lack sterols,  
18 however, some can synthesize a family of sterol-analogues called hopanoids. Hopanoids are  
19 recognized as bacterial analogs of sterols due to their chemical and biophysical similarities. Notably,  
20 hopanoids are proposed as evolutionary sterol precursors since they have been found in ancient  
21 sediments and their biosynthesis could have proceeded prior to the oxygenation of Earth's surface.  
22 While hopanoids and sterols can both impart order to saturated phospholipids, this interaction  
23 changes vastly with the presence of a double bond in the phospholipid's acyl chain. Here, we present  
24 a study examining how the unsaturation position along the acyl chain influences the ordering effect of  
25 sterols (cholesterol) and hopanoids (diplopterol). We found that diplopterol and cholesterol exhibit  
26 different ordering effects on unsaturated lipids, depending on the relative positions of the double bond  
27 and the methyl groups of cholesterol/diplopterol. Moreover, in the bacterium *Mesoplasma florum*,  
28 diplopterol's interplay with unsaturated lipid isomers modulates bacterial membrane robustness.  
29 These results reveal how subtle changes in lipid structure can influence the membrane's collective  
30 properties and introduces double bond position as a modifiable lipidomic feature that cells can employ  
31 to fine-tune their membrane for adaptation to environmental change.

32

## 33 **INTRODUCTION**

34

35 Most living organisms share a common construct: the cell membrane. This thin bilayer of lipids defines  
36 the cell-environment interface, facilitating the cell's interactions with its surroundings. Not only does  
37 the bilayer layer protect against external physical and chemical perturbations, but it also serves as an  
38 organizational scaffold for cellular bioactivity. To support these functions, the membrane must  
39 modulate its biophysical properties to be simultaneously bioactive and mechanically robust.  
40 Ultimately, this is achieved through its lipid composition<sup>1</sup>.

41

42 A biological membrane is made of a diverse mix of lipids, and each lipid's distinctive structure  
43 contributes to membrane's physical properties and functions. The main components of most  
44 membranes are phospholipids, a family of lipids with a hydrophilic head group and a hydrophobic, long

45 hydrocarbon chain called the acyl chain. Phospholipid acyl chain chemistry can influence membrane  
46 properties. For instance, acyl chains made of only single carbon-carbon bonds (or saturated lipids)  
47 create stiff membranes, while acyl chains with double bonds (or unsaturated lipids) make the  
48 membrane more fluid<sup>2</sup>. While each lipid's chemistry individually contributes to the membrane  
49 properties, their collective interactions also have an impact on the emergent properties of the  
50 membrane. A prime example of this is the role of sterols in Eukaryotes. These compounds have a planar  
51 ring system which acts as a scaffold supporting their packing with phospholipids<sup>3,4</sup>. When combined  
52 with saturated lipids, these lipid makes the membrane more diffusive, facilitating biological reactions.  
53 When combined with unsaturated lipids, sterols make the membrane more densely packed and robust  
54 against physical stresses<sup>5,6</sup>. In combination, cells employ lipid unsaturation as well as the ordering  
55 effect of sterols to modulate membrane properties.

56  
57 Most non-eukaryotic organisms cannot synthesize sterols and must rely on other mechanisms to  
58 modulate their membrane properties<sup>7,8</sup>. Some bacteria utilize a family of compounds called  
59 hopanoids<sup>9</sup>. Hopanoids, like sterols, are tri-terpenoids and were discovered in the sedimentary record  
60 as early as 1.64 billion years ago<sup>10</sup>. Since both families are synthesized from squalene, with homologous  
61 enzymes (squalene-hopene cyclase and oxidosqualene cyclase)<sup>11-13</sup>, they share certain chemical  
62 similarities. Like sterols, hopanoids also reside within the plasma membrane and contribute  
63 significantly to membrane robustness, permeability, and resistance against abiotic stresses<sup>9,14-19</sup>. For  
64 these reasons, hopanoids are considered both bacterial and ancient sterol analogs.

65  
66 However, despite their similarities, hopanoids and sterols possess distinct properties. In the case of  
67 diplopterol (Dpop), a common hopanoid in bacteria, and cholesterol (Chol) a mammalian sterol both  
68 interact favorably with and condense saturated lipids, which is a diagnostic feature of lipid ordering<sup>6</sup>.  
69 However, the condensing effect of diplopterol is altered when an acyl chain unsaturation is introduced.  
70 For example, Chol condenses the unsaturated lipid 1,2-Dioleoyl-sn-glycero-3-phosphatidylcholine ( $\Delta 9$ -  
71 PC), while Dpop does not<sup>6,20</sup>. This observation highlighted a fundamental difference between Chol and  
72 Dpop interaction with unsaturated lipids. Interestingly, in 2020, Chwastek et al. investigated the  
73 lipidome of a hopanoid-bearing organism *Methylobacterium extorquens*, and found that the main  
74 unsaturation position was  $\Delta 11$  instead of  $\Delta 9$ , with an additional  $\Delta 5$  in cold-adapted lipidomes<sup>21</sup>. While  
75 the displacement of the double bond from  $\Delta 11$  to  $\Delta 9$  does not change the lipid individual's melting  
76 temperature significantly<sup>22,23</sup>, the placement of the double bond has been shown to change Chol – lipid  
77 interaction in simulation and thus can affect the membrane's collective properties<sup>24</sup>. If this is the same  
78 case for Dpop, then perhaps bacteria's selection for double bond placement also modulates its  
79 membrane properties and could represent a mechanism of fine-tuning during temperature  
80 adaptation.

81  
82 This study examines how the position of a double bond in the phospholipid acyl chain influences Dpop  
83 – lipid interactions. We show that while unsaturation position modulates both Dpop and Chol  
84 interaction with unsaturated lipids, they do so in distinct ways. Molecular dynamic simulations suggest  
85 that this difference stems from Dpop's methyl group distribution. Finally, we examine the effects of  
86 unsaturation position on Dpop/Chol–lipid interactions in the context of a biological membrane. In the  
87 bacteria *Mesoplasma florum*, the more favorable interaction between  $\Delta 11$  and Dpop enhances the  
88 membrane's robustness against osmotic shock. Taken together, our work highlighted the link between  
89 lipid chemistry and lipid–lipid interactions, as well as its consequence for biomembrane robustness.

90

## 91 RESULTS

92

93 Chol and Dpop serve crucial roles in modulating membrane properties through their unique ability to  
94 influence the order of phospholipids within the bilayer. The interactions of Chol and Dpop with  
95 phospholipids can change significantly with acyl chain unsaturation, however, the effect of double  
96 bond position has rarely been discussed. We hypothesize that the position of double bonds along the  
97 phospholipid acyl chain impacts Chol/Dpop ordering, thus representing a constraint in the evolution  
98 of sterol- and hopanoid-containing lipidomes.

99

### 100 **Phospholipid area exhibits small change with varying double bond position at physiological** 101 **pressures**

102 First, we investigated how double bond position influences the lipid packing density of three PC  
103 isomers with two mono-unsaturated chains with double bonds at  $\Delta 6$ ,  $\Delta 9$ ,  $\Delta 11$  positions (Chemical  
104 structures are shown in Fig. 1A). While changing double bond position impacts lipid biophysical  
105 properties like melting temperature significantly<sup>22,23</sup>, how the packing density (e.g. area) of these  
106 individual isomers varies has not been examined in vitro. Here, we employed a lipid monolayer model  
107 system to measure lipid packing density. In brief, lipids are assembled at an air–water interface where  
108 the surface area is slowly reduced to allow rearrangement to a compressible single layer of lipids  
109 (monolayer). The increase in ordering while compressing can be observed as an increase in surface  
110 pressure, allowing an estimation of the surface area of individual lipids in a monolayer.

111

112 The isotherms (surface pressure to area per lipid) of pure  $\Delta 6$ -,  $\Delta 9$ - and  $\Delta 11$ -PC are shown in Figure 1B.  
113 This isotherm reflects how lipid area changes from its liquid relaxed phase to a condensed phase, or  
114 from low surface pressure to high surface pressure. While values in the liquid relaxed phase might give  
115 information about miscibility, higher surface pressures (e.g. 30 mN/m) approach the pressures  
116 characteristic of biological membranes<sup>25</sup>. The differences in molecular area of the 3 isotherms were  
117 less than 3%. At 30 mN/m, the mean molecular area of  $\Delta 6$ -,  $\Delta 9$ -, and  $\Delta 11$ -PC were 65.3, 66.0, and 64.3  
118  $\text{\AA}^2/\text{molecule}$ , respectively. This suggested  $\Delta 9$ -PC was the largest, followed by  $\Delta 6$ -PC and  $\Delta 11$ -PC was  
119 the smallest, in accordance with a previously reported molecular dynamics simulation<sup>26</sup>. Our result  
120 demonstrated that varying double bond placement has a meager effect on the mean molecular area,  
121 despite having a huge impact on lipid melting temperature.

122

### 123 **Both Chol and Dpop ordering are dependent on double bond position**

124 We next examined how acyl chain double bond position impacts interaction of Chol and Dpop with  
125 phospholipids. We deposited mixtures of individual PC isomers and Chol or Dpop (the corresponding  
126 isotherms are shown in Figure 2A,B). At first glance, it is visible that isotherms of the mixtures diverge  
127 more across different double bonds compared with pure lipid isotherms. The trend shows that  $\Delta 11$ -PC  
128 has the lowest area per lipid, while  $\Delta 6$ - and  $\Delta 9$ -PC are more similar to one another.

129

130 One of the unique and diagnostic features of Chol is its ability to increase lipid packing density, which  
131 can be observed in a lipid monolayer through the so-called condensation effect<sup>27</sup>. In brief, a positive  
132 condensation effect occurs when a lipid mixture has a lower area than the area that would result from  
133 conservative mixing of the areas from the respective individual lipids. Consequently, the introduction  
134 of Chol to a phospholipid monolayer leads to a lower area of the lipid mixture than would be predicted  
135 from the observed areas of Chol and phospholipids. Condensation effects of Chol and Dpop were  
136 calculated according to the area per molecule values at 30 mN/m and reflected in Figure 2C. Here, Chol

137 consistently exhibited a condensing effect with unsaturated lipids regardless of the double bond  
138 position. In contrast, Dpop orders lipid isomers to a lesser extent, even negatively in the case of  $\Delta 9$ -  
139 DOPC. The data highlight the clear differences between the ordering effects of Chol and Dpop on  
140 unsaturated lipids with varying double bond positions.

141  
142 While the condensation effect provides a functional readout of lipid packing efficiency, the monolayer  
143 also offers insights on how lipids interact thermodynamically through the calculation of the Gibbs free  
144 energy of interaction  $\Delta G$ .  $\Delta G$  reflects the affinity of 2 compounds for each other, in which the lower  
145 the  $\Delta G$ , the more favorably two lipids interact<sup>28</sup>.  $\Delta G$ s were calculated in 5 mN/m intervals and shown  
146 in Figure 2D. Chol interacted most favorably with  $\Delta 11$ -PC showing a  $\Delta G$  of -1300 J/mol, comparable to  
147 the free energy of mixing of Chol with some saturated lipids<sup>28</sup>.  $\Delta 9$ - and  $\Delta 6$ -PC interaction with Chol  
148 were comparable and roughly 30% less favorable than with  $\Delta 11$ -PC. This data suggests that Chol has a  
149 preference for double bonds positioned further away from the head group, however from the limited  
150 data here the relationship does not appear to be linear. In contrast, the interaction between Dpop and  
151 PC isomers diverged from those observed with Chol. The  $\Delta 6$ -PC and Dpop mixture yielded  $\Delta G$  of  
152 approximately 0 reflecting perfect mixing.  $\Delta 9$ -PC had a positive  $\Delta G$  indicating a repulsive interaction.  
153 Interestingly,  $\Delta 11$ -PC yielded a  $\Delta G$  of -100kJ revealing that only  $\Delta 11$ -PC interacted favorably with  
154 Dpop. This trend is completely different compared with the pattern observed with Chol, piquing  
155 interest in the investigation into the forces governing these interactions.

156  
157 Together, these observations indicate that double bond position strongly influences the lipid ordering  
158 effect of both Chol and Dpop. While all isomers interact favorably with Chol with only some  
159 quantitative differences, that is not the case for Dpop. By moving the double bond just 2 carbons from  
160  $\Delta 11$  to  $\Delta 9$ , the interaction changes from favorable to unfavorable, potentially destabilizing the  
161 membrane. It is thus important to gain a deeper understanding of this phenomenon as well as its  
162 consequences on biological membranes.

163

#### 164 **Dpop methyl group distribution mediates interactions with unsaturated lipids**

165 While  $\Delta 9$  and  $\Delta 11$  are two unsaturation sites most commonly found in nature<sup>29-31</sup>, our in vitro  
166 experiments showed that they interacted completely differently with Dpop. To gain molecular insight  
167 into this variance, we performed *in silico* analyses using molecular dynamic simulations. We first  
168 considered the ordering effect of Dpop to individual acyl chains through the deuterium order  
169 parameter  $S_{CD}$ <sup>32</sup>. In brief,  $S_{CD}$  describes the relative orientation of the C-H bond relative to the bilayer  
170 normal. Higher  $S_{CD}$  values correspond to more ordered acyl chain conformations.

171  
172 To ground-truth our model results, we first considered the interaction of Dpop with saturated DPPC  
173 since this is well-characterized. Dpop orders saturated lipids comparably to Chol<sup>6</sup>. Fig 3A investigated  
174 the interaction between Dpop and DPPC (1,2-dipalmitoyl-sn-glycero-3-phosphatidylcholine) at  
175 temperatures above and below the melting transition temperature of DPPC. As the concentration of  
176 Dpop increased, both acyl chains of DPPC displayed higher order, indicating the effect of Dpop  
177 consistent with our previous experimental observations<sup>6,33</sup>. This effect was more prominently seen in  
178 the liquid rather than gel phase. Next, we considered lipids with sn-1 saturated and sn-2 unsaturated  
179 acyl chains (Fig 3B). Interestingly, Dpop showed a larger ordering effect for the saturated chain relative  
180 to the unsaturated chain, suggesting that the interaction of Dpop with lipids containing asymmetrically  
181 unsaturated acyl chains may exhibit different collective properties than with lipids containing all  
182 saturated or unsaturated acyl chains. We then considered how Dpop's ordering effect varies with

183 double bond position in the unsaturated chain. In the sn-2 position,  $\Delta 11$  was ordered more similarly  
184 to saturated chains than  $\Delta 9$ , suggesting a higher ordering of Dpop for the individual  $\Delta 11$  chain. In PC  
185 with unsaturation in both acyl chains, we observed that chain position (sn-1 or sn-2) imparted little  
186 effect on ordering. Rather, the position of the double bond was critical in determining the acyl chain's  
187 order when interacting with Dpop (Fig 3C). Ordering was higher for  $\Delta 11$ -PC compared with  $\Delta 9$ -PC,  
188 similar to what we saw in the monolayer system.

189  
190 In a previous simulation, Martinez-Seara et al. highlighted how PC's double bond and Chol's methyl  
191 group placement impacted the ordering effect<sup>24</sup>. We thus investigate the placement of PC's double  
192 bond relative to the positions of methyl groups extending from the Dpop ring structure. We focused  
193 on the methyl groups annotated in Fig 1A due to their relative proximity to acyl chain unsaturations.  
194 Figure 4 describes the probability of placement of  $\pi$  bonds and methyl group in the z-axis, vertical from  
195 the membrane plane, with 0 being the center of the hydrophobic region. Between the 2 lipid mixes,  
196 there was a displacement of individual methyl groups of Dpop, most visibly in the M1 position,  
197 suggesting Dpop–lipid interactions rearranged molecules and methyl group placement. More  
198 importantly,  $\Delta 9$ -PC's double bond seemed to align with methyl group M2, while  $\Delta 11$ -PC double bond  
199 did not co-localize with other methyl groups. Given a repulsive Van der Waals forces between the  $\pi$   
200 bond and the methyl group, this alignment might explain the reduced condensing effect observed for  
201  $\Delta 9$ -PC, while Dpop and  $\Delta 11$ -PC interacted more favorably. This interplay between lipid structure and  
202 membrane biophysics provides insights that could be extended to other sterols and hopanoids,  
203 possibly laying a path for predicting how hopanoid/sterol and phospholipid structure collectively  
204 influence membrane properties.

#### 205 206 **Dpop different interaction to unsaturation sites affect *Mesoplasma florum* susceptibility to osmotic** 207 **shock**

208 So far, we have established that the interaction of Dpop with phospholipids changes across double  
209 bond isomers. To investigate how this variation in lipid–lipid interaction can affect biomembrane  
210 properties, we employed *Mesoplasma florum* as a living model system. *M. florum* is a Mollicute with  
211 no cell wall and a minimal genome<sup>34–36</sup>. With limited machinery, *Mesoplasma* cannot synthesize its  
212 own lipids and relies on supplemented lipids from the media, offering a straightforward way to  
213 manipulate its lipidomes. Previously characterized as *Acholeplasma*, this bacterium is not sterol-  
214 dependent<sup>37</sup>. By introducing either  $\Delta 9$ - or  $\Delta 11$ -PC to its lipid diet, we can create two identical biological  
215 membrane systems differing only in their unsaturation site. We then investigated this system to  
216 explore the effect of lipid–lipid interactions on a cellular scale.

217  
218 Traditionally cultured with an undefined lipid diet in serums, we first test *Mesoplasma*'s ability to grow  
219 in a defined lipid diet comprised of egg sphingomyelin, palmitic acid, and the addition of either Dpop  
220 or Chol, and  $\Delta 9$ - and/or  $\Delta 11$ -PC. Figure 5A displays the cellular lipid content, indicating that Dpop/Chol  
221 were incorporated into the cell. We measured *Mesoplasma*'s growth through the proxy of media pH  
222 acidification with phenol red signal<sup>38</sup>. The growth rate recorded in Figure 5B suggested all diets  
223 sustained *Mesoplasma florum*'s growth. *Mesoplasma* grew faster when supplemented with  $\Delta 9$ -PC  
224 rather than  $\Delta 11$ -PC, in both combinations with Dpop or Chol.

225  
226 Since Chol ordering of unsaturated lipids has previously been associated with membrane robustness,  
227 we tested *Mesoplasma* membrane robustness with osmotic shock. Live cells were harvested and  
228 resuspended in hypoosmotic conditions. As water from outside the cell rushes inwards to equilibrate

229 osmolarity, the cell expands and the membrane is stressed and ruptures. This rupture then exposes  
230 cellular DNA to propidium iodide, a dye that cannot penetrate intact membranes, but which fluoresces  
231 when it interacts with DNA. By quantifying the fluorescence intensity, we estimated the fraction of  
232 cells lysed due to osmotic shock, and consequently assayed membrane robustness. Figure 5C shows  
233 the cell's susceptibility to osmotic shock when supplied with different lipid diets. When cells were  
234 supplied with Chol, the addition of  $\Delta 9$ - or  $\Delta 11$ -PC did not produce significant changes in cellular  
235 robustness. However, cells fed with  $\Delta 9$ -PC and Dpop exhibited higher susceptibility than cells fed with  
236  $\Delta 11$ -PC and Dpop. This data suggested that Dpop and  $\Delta 9$ -PC unfavorable interaction counteracts  
237 Dpop's ability to bolster membrane robustness.

238

## 239 DISCUSSION

240

241 Most organisms require unsaturated lipids for membrane fluidity. Several desaturation pathways have  
242 evolved to synthesize double bond positioned at  $\Delta 9$  or  $\Delta 11$ <sup>29–31</sup>. While these two double bond positions  
243 might be selected due to their significant effect in lowering lipid melting temperature (from the fully  
244 saturated phospholipid)<sup>22,23</sup>, the biological distinctions between the two positions remain elusive. Why  
245 would life have evolved two different pathways for lipids with nearly identical properties? Our study  
246 first investigated the area and packing density of individual unsaturated lipid isomers. While  $\Delta 9$ -PC  
247 displayed a larger area per lipid than other PC isomers, the change was small, consistent with previous  
248 simulations<sup>26</sup>. Similarly lipid packing density showed negligible changes, suggesting that a key  
249 difference might lie in the interaction with other lipids.

250

251 Cholesterol and diplopterol are both prevalent lipids, accounting for more than 40% of their respective  
252 membrane lipidomes<sup>21,39</sup>. Our data suggested both these components interact with unsaturated lipids  
253 in a double bond position-dependent manner. While cholesterol condenses all unsaturated isomers,  
254 diplopterol can only condense  $\Delta 11$ -PC, albeit less potently than cholesterol. Further simulations  
255 suggest this difference stems from the interaction of the isoprenoid's methyl group and the  
256 phospholipid's double bond. For diplopterol, its interaction with unsaturated lipids is significantly  
257 hindered by having multiple methyl groups extending from both sides of the cyclic ring, similar to  
258 biosynthetic precursor to cholesterol, lanosterol<sup>40–43</sup>. Notably, when the double bond resides in  $\Delta 9$   
259 position, and its distribution overlaps with the methyl group M2, it prevents effective diplopterol  
260 packing, resulting in a stark contrast between diplopterol's repulsive interaction with  $\Delta 9$ -PC and  
261 favorable interaction with  $\Delta 11$ -PC.

262

263 From these observations, we hypothesize that the differentiation between  $\Delta 9$  and  $\Delta 11$  might be the  
264 most significant in hopanoid-bearing organisms. We probed this lipid–lipid interaction in the bacteria  
265 *Mesoplasma florum* and found that the favorable interaction of  $\Delta 11$ -PC and diplopterol enhanced  
266 membrane resilience to osmotic shock compared to  $\Delta 9$ -PC. This is an indicator of a more robust  
267 membrane against physical stress, as well as a potential mechanism for osmoadaptation, which  
268 hopanoids were previously shown to play a critical role in soil and plant associated bacteria<sup>44,45</sup>. Indeed,  
269 multiple hopanoid-bearing bacteria have  $\Delta 11$  as the monounsaturations site<sup>29</sup>, instead of  $\Delta 9$  in  
270 eukaryotes. Our observations, however, show that this preference is not crucial for cholesterol-bearing  
271 organisms. Cholesterol exhibits efficient packing with all isomers tested, leading to comparable  
272 membrane robustness against osmotic shock. This might difference might have alleviated any  
273 evolutionary selection against  $\Delta 9$  in early sterol-bearing organisms, providing more flexibility to  
274 produce lipids with double bond positions optimized for orthogonal lipid-lipid or lipid-protein

275 interactions. Our results, therefore, suggest that a transition from hopanoid to sterol-containing  
276 lipidomes could have widened the chemical landscape available for cells to explore in assembling their  
277 membranes.

278

279 The acyl chain's double bond position can provide benefits in other cellular contexts as well. We  
280 previously observed that when challenged with extreme cold temperatures (e.g. below 15 C)  
281 *Methylobacterium extorquens* introduces a double bond in the  $\Delta 5$  position<sup>21</sup>. Considering that the  $\Delta 5$   
282 unsaturation would have a negligible effect on the fluidity of the membrane, it was not clear why *M.*  
283 *extorquens* would employ this modification during cold adaptation. Our current observations indicate  
284 that a  $\Delta 5$  unsaturation could disrupt diplopterol ordering thereby compensating for reduced fluidity at  
285 lower temperatures. This phenomenon introduces a potential mechanism for membrane fine-tuning  
286 membrane fluidity via diplopterol–lipid interactions.

287

288 In summary, our research elucidates how the placement of phospholipid unsaturation modulates the  
289 condensing effect of cholesterol or diplopterol, and potentially other sterols and hopanoids. These  
290 lipid-lipid interactions influence membrane properties such as robustness, potentially introducing  
291 selection pressures on the position of double bonds dictated by the reliance on either sterols or  
292 hopanoids as ordering lipids. Moreover, shifting double bonds along the acyl chain can fine-tune  
293 membrane properties for adaptation to environmental conditions such as cold temperature or osmotic  
294 stress. Our findings emphasize the complexity of lipid-lipid interactions and underscore how subtle  
295 structural variations in lipids can influence collective membrane properties.

296

## 297 **METHODS**

298

### 299 **MATERIALS**

300  $\Delta 6$ -,  $\Delta 9$ -,  $\Delta 11$ -PC and egg sphingomyelin were purchased from Avanti Polar Lipids. Chol and palmitic  
301 acid were purchased from Sigma, and Dpop from Chiron. Stock concentrations of lipids were measured  
302 by phosphate assay. Chol and Dpop were weighed out on a precision scale and solubilized in a known  
303 volume of chloroform.

304

### 305 **MONOLAYER**

306 Chloroform solutions of pure lipids and mixtures were prepared at 0.2 mg/mL lipid concentrations.  
307 Monolayers were prepared by injecting 15-30  $\mu$ L of lipid solution onto an aqueous subphase  
308 maintained at 25°C by a built-in temperature-controlled circulating water bath. The subphase was  
309 comprised of 10 mM Hepes, 150 mM NaCl, pH to 7. Isotherms were recorded using a 70 cm<sup>2</sup> teflon  
310 Langmuir trough fitted with a motorized compression barrier equipped with pressure sensor (Kibron  
311 DeltaPi).

312 The mean molecular area (MMAs) for each mixture were estimated from the averages of isotherms  
313 from three monolayers that were prepared independently. Data were rounded down to the nearest  
314 neighbor for condensation effect and free energy calculation. All isotherms were fitted to a regression,  
315 and statistical significance was tested using manova with the 2 coefficients.

316 The condensation effect was calculated as follows:

317

$$c = 100 - \frac{A_0}{X_1A_1 + X_2A_2} (\%)$$

318 Where  $c$  = % condensation,  $A_0$  = the MMA of the lipid mixture,  $X_1$ ,  $X_2$  = the mole fraction of lipid 1 and  
319 2 in the mix, and  $A_1$ ,  $A_2$  = the MMAs of lipid 1 and 2 at surface pressures 30 mN/m. Error bars were  
320 produced based on error propagation.

321 The  $\Delta G$  was calculated by integrating the areas of lipid mixtures over pressures  $\Pi = 5, 10, 15, 20,$  and  
322  $25 \text{ mN/m}$  according to Grzybek et al<sup>25</sup>. Error bars were produced based on error propagation.

323

#### 324 DIPLOPTEROL MODEL DEVELOPMENT

325 A CHARMM compatible model for diplopterol (Dpop) was developed using the automated atom typing  
326 and parameter assignment pipeline CGenFF.<sup>30</sup> Charmm topology and parameter files are provided as  
327 Supplemental Material.

328

#### 329 SIMULATION COMPOSITION AND CONSTRUCTION

330 Simulation systems contained either DOPC or POPC (unsaturation at either the  $\Delta 6,$   $\Delta 9,$  or  $\Delta 11$  position)  
331 and one of either Dpop or Chol. All initial configurations were built using the CHARMM-GUI  
332 webserver.<sup>47–49</sup> Systems containing atypical unsaturated chains ( $\Delta 6$  or  $\Delta 11$ ) were generated by first  
333 building a binary mixture of the corresponding  $\Delta 9$  lipid (DOPC or POPC) with either Dpop or Chol, then  
334 “mutating” the unsaturated chain(s) to move the double bond to the appropriate position, using a  
335 Charmm script provided by the Klauda Lab (Univ. of Maryland; script provided in Supplemental  
336 Materials).

337

338 All simulations contained approximately 550 lipids per leaflet and at least 50 TIP3P<sup>50</sup> water molecules  
339 per lipid. All lipids were modeled with the CHARMM36 force-field,<sup>51</sup> except Dpop which was modeled  
340 using CGenFF as described above. Initial dimensions in the membrane plane were about  $17.5 \text{ nm} \times$   
341  $17.5 \text{ nm}$ , containing approximately 270,000 atoms. Initial structures of 1,2-Dioleoyl-sn-glycero-3-  
342 phosphocholine (DOPC) and 1-Palmitoyl-2-oleoyl-sn-glycero-3-phosphocholine (POPC) were  
343 constructed using CHARMM-GUI. Simulations box sizes used 50 water molecules per lipid using TIP3  
344 water.

345

346 Eight different binary mixtures were simulated:  $\Delta 6$ -DOPC: Dpop,  $\Delta 9$ -DOPC: Dpop,  $\Delta 11$  DOPC: Dpop,  
347  $\Delta 9$ -POPC: Dpop,  $\Delta 11$  POPC: Dpop,  $\Delta 6$ -DOPC:Chol,  $\Delta 11$ -DOPC:Chol, and  $\Delta 11$ -POPC:Chol. Each binary  
348 mixture was simulated at four different compositions: 95:5, 85:15, 70:30, 50:50. Each binary system  
349 was simulated for 500 nsec of production simulation as described below. 5 additional controls were  
350 simulated without any sterol or hopanoid, each for 50 nsec of production simulation as described  
351 below:  $\Delta 6$ -DOPC,  $\Delta 9$ -DOPC,  $\Delta 11$ -DOPC,  $\Delta 9$ -POPC,  $\Delta 11$ -POPC.

352

#### 353 EQUILIBRATION AND PRODUCTION SIMULATIONS

354 Each system was prepared individually for production simulation through a series of 6 minimization  
355 and heating steps as provided by the CHARMM-GUI equilibration protocol: (i) steepest descent to  
356 minimize the initial configuration; (ii) 125,000 steps of leapfrog dynamics with a 1 fsec timestep and  
357 velocities reassigned every 500 steps; (iii) 125,000 steps of leapfrog dynamics with a 1 fsec timestep,  
358 pressure controlled by the Parinello-Rahman barostat<sup>52</sup> and velocities reassigned every 500 steps, then  
359 a total of 750,000 steps of leapfrog dynamics with a 2 fsec timestep and hydrogen positions  
360 constrained by LINCS,<sup>53</sup> pressure controlled by the Parinello-Rahman barostat,<sup>52</sup> and velocities  
361 reassigned every 500 steps. During equilibration, double bonds were restrained in the *cis* configuration  
362 to prevent isomerization; these restraints are gradually reduced during the final three stages of the  
363 equilibration protocol. Production simulations (NPT ensemble) were integrated with leapfrog using the  
364 Parinello-Rahman<sup>52</sup> barostat to control pressure (time constant 5 psec; compressibility  $4.5 \times 10^{-5} \text{ bar}^{-1}$ ;  
365 coupled anisotropically to allow independent fluctuation of the in-plane and normal directions) and  
366 temperature controlled using Nose-Hoover<sup>54,55</sup> (time constant 1 psec) at a temperature of  $298 \text{ }^\circ\text{C}$ .



367 Hydrogens were constrained with LINCS (expansion order 4), a 2 fsec timestep was used, short range  
368 electrostatics were computed directly within 1.2 nm, and long-range electrostatics were computed  
369 every timestep using particle mesh Ewald<sup>56,57</sup> with a grid spacing of 1 Å and cubic interpolation. Long  
370 range dispersion was smoothly truncated over 10-12 nm using a force-switch cutoff scheme.  
371 Simulations that included DPOP used Gromacs 2020.4, while simulations that included were run on a  
372 different resource and used Gromacs 2018.3.

373

#### 374 CALCULATION OF SIMULATION OBSERVABLES

375 The angle between either Dpop or Chol and the membrane normal, defining the orientation of both  
376 by a vector from atom C24 to atom O3 (see Supplemental Figure SXX). The locations of methyl groups  
377 in Dpop or Chol along the direction normal to the membrane were recorded and compiled into  
378 histograms with a bin size of 0.87 Å. Deuterium order parameters were obtained from the simulations  
379 via  $S_{CD} = \frac{1}{2} \langle 3 \cos^2(\phi) - 1 \rangle$ , where  $\phi$  is the angle between the C-H bond vectors along the  
380 hydrocarbon chain. They were computed with the orderparam2.tcl script produced by Justin  
381 Gullingsrud. The area per lipid was calculated using the Voronoi construction implemented in  
382 MEMBPLUGIN.<sup>58</sup> The location of each lipid is defined by the center of geometry of the C2, C21, and  
383 C31 atoms and the location of the Chol/ Dpop was defined by the O3 atom, and then a Voronoi  
384 construction is built around these points in the plane parallel to the membrane surface.

385

#### 386 CELL CULTURE

387 *Mesoplasma florum* L1 strains were grown in a modified, lipid-free SP4 media with components as  
388 follows (per 1L): Bacto Tryptone 10g, Bacto Peptone 5.3g, PPLO 3.5g, BSA 5.95g, Yeastoleate 2g, D-  
389 Glucose 5g, sodium bicarbonate 3.15g, L-Glutamine 0.05g, Penicillin G-sodium salt 0.645g, phenol red  
390 11 mg/L, pH to 7.0 and filtered. Lipid diet was added separately prior to passaging at concentration:  
391 Dpop, Chol 5 mg/L, egg sphingomyelin 25 mg/L, palmitic acid 10 mg/L, Δ9- and Δ11-PC 12.5 mg/L for  
392 the corresponding diets. Cells were grown in glass flasks and incubated at either 30°C with shaking at  
393 60 rpm. Growth was recorded using phenol red media pH detection through absorbance at 562nm  
394 using a 10mm cuvette (DeNovix DS-11 FX+). Growth rate was defined as negative of the slope of the  
395 linearly fitted trendline in the indicative range of phenol red (OD<sub>562nm</sub> from 0.75 – 0.4).

396

#### 397 MEMBRANE INCORPORATION

398 Cells were collected in early exponential stage and centrifuged (5000 rcf, 7 min, 30°C). Supernatant  
399 were discarded and cell pellet was washed with wash buffer (200 mM NaCl, 25 mM HEPES, 1% glucose,  
400 pH 7.0) and centrifuged (5000 rcf, 7 min, 30°C). The collected pellet was then subjected to a Bligh Dyer  
401 extraction<sup>59</sup>. Briefly, the pellet was homogenized in a mixture of water:chloroform:methanol in 0.8:1:2  
402 ratio and sonicated for 2 minutes. Subsequently, water and chloroform were added in 1:1 ratio. The  
403 mixture was sonicated for 2 minutes, and centrifuged at 2000 rcf for 30 seconds in a mini centrifuge  
404 to promote phase separation. The lower, organic fraction containing lipids was collected and  
405 transferred to a fresh tube. The total lipid extract was then deposited on a silica gel plate (Supelco)  
406 and placed in a glass chamber. Chromatography was first performed using chloroform as the running  
407 phase, then chloroform:methanol:water (65:35:4) as the running phase to half plate length. After the  
408 run, the plate was dried and stained using 8 % copper sulphate in 3% phosphoric acid solution and  
409 heated until visible bands were observed. Images were captured using a GelDoc (Biozym Azure c600)  
410 and analysed using ImageJ.

411

#### 412 MEMBRANE OSMOTIC SHOCK

413 Cells were collected in early exponential stage and centrifuged (5000 rcf, 7 min, 30°C). The collected  
414 pellet was resuspended in a serial dilution of 0%, 20%, 40%, 60%, 80% and 100% of wash buffer (200  
415 mM NaCl, 25 mM HEPES, 1% glucose, pH 7.0). The suspension was stained with 10 uM propidium  
416 iodide and added to a 96-well plate. Fluorescence emission was recorded using a Tecan Spark  
417 fluorescence reader, with excitation at 529 – 549 nm and emission at 609 – 629 nm. The fraction of  
418 cell lysed was calculated by normalizing the signal of each sample to the 0% and 100% wash buffer  
419 sample.  
420  
421

422 REFERENCES

- 423 1. Harayama, T. & Riezman, H. Understanding the diversity of membrane lipid composition. *Nature*  
424 *Reviews Molecular Cell Biology* vol. 19 281–296 (2018).
- 425 2. Harayama, T. & Antonny, B. Beyond Fluidity: The Role of Lipid Unsaturation in Membrane  
426 Function. *Cold Spring Harb. Perspect. Biol.* a041409 (2023) doi:10.1101/cshperspect.a041409.
- 427 3. Yeagle, P. L. Cholesterol and the cell membrane. *Biochim. Biophys. Acta BBA - Rev. Biomembr.*  
428 **822**, 267–287 (1985).
- 429 4. Bloch, K. E. Sterol, Structure and Membrane Function. *Crit. Rev. Biochem.* **14**, 47–92 (1983).
- 430 5. Adaptive Lipid Packing and Bioactivity in Membrane Domains | PLOS ONE.  
431 <https://journals.plos.org/plosone/article?id=10.1371/journal.pone.0123930>.
- 432 6. Sáenz, J. P., Sezgin, E., Schwille, P. & Simons, K. Functional convergence of hopanoids and sterols  
433 in membrane ordering. *Proc. Natl. Acad. Sci. U. S. A.* **109**, 14236–14240 (2012).
- 434 7. Wei, J. H., Yin, X. & Welander, P. V. Sterol synthesis in diverse bacteria. *Front. Microbiol.* **7**,  
435 (2016).
- 436 8. Fischer, W. W., Summons, R. E., Pearson, & A. *Targeted genomic detection of biosynthetic*  
437 *pathways: anaerobic production of hopanoid biomarkers by a common sedimentary microbe.*  
438 *Geobiology* vol. 3 33–40 [www.tigr.org/tigr-scripts/CMR2/GenomePage3.spl?database=](http://www.tigr.org/tigr-scripts/CMR2/GenomePage3.spl?database=) (2005).
- 439 9. Belin, B. J. *et al.* Hopanoid lipids: From membranes to plant-bacteria interactions. *Nature*  
440 *Reviews Microbiology* vol. 16 304–315 (2018).
- 441 10. Brocks, J. J. *et al.* Biomarker evidence for green and purple sulphur bacteria in a stratified  
442 Palaeoproterozoic sea. *Nature* **437**, 866–870 (2005).
- 443 11. Lenhart, A. *et al.* Binding Structures and Potencies of Oxidosqualene Cyclase Inhibitors with the  
444 Homologous Squalene–Hopene Cyclase. *J. Med. Chem.* **46**, 2083–2092 (2003).
- 445 12. Ermondi, G. & Caron, G. GRIND-based 3D-QSAR to predict inhibitory activity for similar enzymes,  
446 OSC and SHC. *Eur. J. Med. Chem.* **43**, 1462–1468 (2008).
- 447 13. Racolta, S., Juhl, P. B., Sirim, D. & Pleiss, J. The triterpene cyclase protein family: A systematic  
448 analysis. *Proteins Struct. Funct. Bioinforma.* **80**, 2009–2019 (2012).
- 449 14. Kulkarni, G. *et al.* Specific Hopanoid Classes Differentially Affect Free-Living and Symbiotic States  
450 of Bradyrhizobium diazoefficiens. *mBio* **6**, 10.1128/mbio.01251-15 (2015).
- 451 15. Ricci, J. N., Morton, R., Kulkarni, G., Summers, M. L. & Newman, D. K. Hopanoids play a role in  
452 stress tolerance and nutrient storage in the cyanobacterium Nostoc punctiforme. *Geobiology* **15**,  
453 173–183 (2017).
- 454 16. Brenac, L., Baidoo, E. E. K., Keasling, J. D. & Budin, I. Distinct functional roles for hopanoid  
455 composition in the chemical tolerance of Zymomonas mobilis. *Mol. Microbiol.* **112**, 1564–1575  
456 (2019).
- 457 17. Bradley, A. S. *et al.* Hopanoid-free Methylobacterium extorquens DM4 overproduces carotenoids  
458 and has widespread growth impairment. *PLOS ONE* **12**, e0173323 (2017).
- 459 18. Rizk, S. *et al.* Functional diversity of isoprenoid lipids in Methylobacterium extorquens PA1. *Mol.*  
460 *Microbiol.* **116**, 1064–1078 (2021).
- 461 19. Kannenberg, E. L. & Poralla, K. Hopanoid Biosynthesis and Function in Bacteria.  
462 *Naturwissenschaften* **86**, 168–176 (1999).
- 463 20. Methylation at the C-2 position of hopanoids increases rigidity in native bacterial membranes |  
464 eLife. <https://elifesciences.org/articles/05663>.
- 465 21. Chwastek, G. *et al.* Principles of Membrane Adaptation Revealed through Environmentally  
466 Induced Bacterial Lipidome Remodeling. *Cell Rep.* **32**, (2020).

- 467 22. Knothe, G. & Dunn, R. O. A Comprehensive Evaluation of the Melting Points of Fatty Acids and  
468 Esters Determined by Differential Scanning Calorimetry. *JAACS J. Am. Oil Chem. Soc.* **86**, 843–856  
469 (2009).
- 470 23. Quinn, P. J. The fluidity of cell membranes and its regulation. *Prog. Biophys. Mol. Biol.* **38**, 1–104  
471 (1981).
- 472 24. Martinez-Seara, H. *et al.* Interplay of unsaturated phospholipids and cholesterol in membranes:  
473 Effect of the double-bond position. *Biophys. J.* **95**, 3295–3305 (2008).
- 474 25. Grzybek, M., Kubiak, J., Lach, A., Przybylo, M. & Sikorski, A. F. A raft-associated species of  
475 phosphatidylethanolamine interacts with cholesterol comparably to sphingomyelin. A Langmuir-  
476 Blodgett monolayer study. *PLoS ONE* **4**, (2009).
- 477 26. Martinez-Seara, H. *et al.* Effect of double bond position on lipid bilayer properties: Insight  
478 through atomistic simulations. *J. Phys. Chem. B* **111**, 11162–11168 (2007).
- 479 27. Demel, R. A., Van Deenen, L. L. M. & Pethica, B. A. Monolayer interactions of phospholipids and  
480 cholesterol. *Biochim. Biophys. Acta BBA - Biomembr.* **135**, 11–19 (1967).
- 481 28. Almeida, P. F. F. Thermodynamics of lipid interactions in complex bilayers. *Biochim. Biophys. Acta*  
482 *- Biomembr.* **1788**, 72–85 (2009).
- 483 29. Fulco, A. J. Fatty acid metabolism in bacteria. *Prog. Lipid Res.* **22**, 133–160 (1983).
- 484 30. From zero to six double bonds: phospholipid unsaturation and organelle function - PubMed.  
485 <https://pubmed.ncbi.nlm.nih.gov/25906908/>.
- 486 31. Bloch, K. Enzymic synthesis of monounsaturated fatty acids. *Acc. Chem. Res.* **2**, 193–202 (1969).
- 487 32. Schindler, H. & Seelig, J. Deuterium order parameters in relation to thermodynamic properties of  
488 a phospholipid bilayer. Statistical mechanical interpretation. *Biochemistry* **14**, 2283–2287 (1975).
- 489 33. Sáenz, J. P. *et al.* Hopanoids as functional analogues of cholesterol in bacterial membranes. *Proc.*  
490 *Natl. Acad. Sci. U. S. A.* **112**, 11971–11976 (2015).
- 491 34. Baby, V. *et al.* Inferring the Minimal Genome of *Mesoplasma florum* by. *mSystems* **3**, 1–14  
492 (2018).
- 493 35. Lachance, J. *et al.* Genome-scale metabolic modeling reveals key features of a minimal gene set.  
494 *Mol. Syst. Biol.* **17**, 1–20 (2021).
- 495 36. Matteau, D. *et al.* Integrative characterization of the near-minimal bacterium *Mesoplasma*  
496 *florum*. *Mol. Syst. Biol.* **16**, 1–25 (2020).
- 497 37. McCoy, R. E., Basham, H. G. & Tully, J. G. *Acholeplasma florum*, a new species isolated from  
498 plants. *Int. J. Syst. Bacteriol.* **34**, (1984).
- 499 38. Matteau, D. *et al.* Integrative characterization of the near-minimal bacterium *Mesoplasma*  
500 *florum*. *Mol. Syst. Biol.* **16**, 1–25 (2020).
- 501 39. Lorent, J. H. *et al.* Plasma membranes are asymmetric in lipid unsaturation, packing and protein  
502 shape. *Nat. Chem. Biol.* **16**, 644–652 (2020).
- 503 40. Urbina, J. A. *et al.* Molecular order and dynamics of phosphatidylcholine bilayer membranes in  
504 the presence of cholesterol, ergosterol and lanosterol: a comparative study using <sup>2</sup>H-, <sup>13</sup>C- and  
505 <sup>31</sup>P-NMR spectroscopy. *Biochim. Biophys. Acta BBA - Biomembr.* **1238**, 163–176 (1995).
- 506 41. Smondyrev, A. M. & Berkowitz, M. L. Molecular Dynamics Simulation of the Structure of  
507 Dimyristoylphosphatidylcholine Bilayers with Cholesterol, Ergosterol, and Lanosterol. *Biophys. J.*  
508 **80**, 1649–1658 (2001).
- 509 42. Sabatini, K., Mattila, J.-P. & Kinnunen, P. K. J. Interfacial Behavior of Cholesterol, Ergosterol, and  
510 Lanosterol in Mixtures with DPPC and DMPC. *Biophys. J.* **95**, 2340–2355 (2008).
- 511 43. Bui, T. T., Suga, K. & Umakoshi, H. Roles of Sterol Derivatives in Regulating the Properties of  
512 Phospholipid Bilayer Systems. *Langmuir* **32**, 6176–6184 (2016).

- 513 44. Tookmanian, E. M., Belin, B. J., Sáenz, J. P. & Newman, D. K. The role of hopanoids in fortifying  
514 rhizobia against a changing climate. *Environ. Microbiol.* **23**, 2906–2918 (2021).
- 515 45. Tookmanian, E. *et al.* Hopanoids Confer Robustness to Physicochemical Variability in the Niche of  
516 the Plant Symbiont Bradyrhizobium diazoefficiens. *J. Bacteriol.* **204**, e00442-21 (2022).
- 517 46. Vanommeslaeghe, K. *et al.* CHARMM general force field: A force field for drug-like molecules  
518 compatible with the CHARMM all-atom additive biological force fields. *J. Comput. Chem.* **31**,  
519 671–690 (2010).
- 520 47. Jo, S., Kim, T., Iyer, V. G. & Im, W. CHARMM-GUI: A web-based graphical user interface for  
521 CHARMM. *J. Comput. Chem.* **29**, 1859–1865 (2008).
- 522 48. CHARMM-GUI Input Generator for NAMD, GROMACS, AMBER, OpenMM, and  
523 CHARMM/OpenMM Simulations Using the CHARMM36 Additive Force Field | Journal of  
524 Chemical Theory and Computation. <https://pubs.acs.org/doi/10.1021/acs.jctc.5b00935>.
- 525 49. Wu, E. L. *et al.* CHARMM-GUI Membrane Builder toward realistic biological membrane  
526 simulations. *J. Comput. Chem.* **35**, 1997–2004 (2014).
- 527 50. Price, D. J. & Brooks, C. L. A modified TIP3P water potential for simulation with Ewald  
528 summation. *J. Chem. Phys.* **121**, 10096–10103 (2004).
- 529 51. Update of the CHARMM All-Atom Additive Force Field for Lipids: Validation on Six Lipid Types |  
530 The Journal of Physical Chemistry B. <https://pubs.acs.org/doi/10.1021/jp101759q>.
- 531 52. Parrinello, M. & Rahman, A. Polymorphic transitions in single crystals: A new molecular dynamics  
532 method. *J. Appl. Phys.* **52**, 7182–7190 (1981).
- 533 53. LINCS: A linear constraint solver for molecular simulations - Hess - 1997 - Journal of  
534 Computational Chemistry - Wiley Online Library.  
535 [https://onlinelibrary.wiley.com/doi/10.1002/\(SICI\)1096-987X\(199709\)18:12%3C1463::AID-](https://onlinelibrary.wiley.com/doi/10.1002/(SICI)1096-987X(199709)18:12%3C1463::AID-JCC4%3E3.0.CO;2-H)  
536 [JCC4%3E3.0.CO;2-H](https://onlinelibrary.wiley.com/doi/10.1002/(SICI)1096-987X(199709)18:12%3C1463::AID-JCC4%3E3.0.CO;2-H).
- 537 54. Nosé, S. A molecular dynamics method for simulations in the canonical ensemble. *Mol. Phys.* **52**,  
538 255–268 (1984).
- 539 55. Hoover, W. G. Canonical dynamics: Equilibrium phase-space distributions. *Phys. Rev. A* **31**, 1695–  
540 1697 (1985).
- 541 56. Darden, T., York, D. & Pedersen, L. Particle mesh Ewald: An  $N \cdot \log(N)$  method for Ewald sums in  
542 large systems. *J. Chem. Phys.* **98**, 10089–10092 (1993).
- 543 57. A smooth particle mesh Ewald method | The Journal of Chemical Physics | AIP Publishing.  
544 [https://pubs.aip.org/aip/jcp/article/103/19/8577/180219/A-smooth-particle-mesh-Ewald-](https://pubs.aip.org/aip/jcp/article/103/19/8577/180219/A-smooth-particle-mesh-Ewald-method)  
545 [method](https://pubs.aip.org/aip/jcp/article/103/19/8577/180219/A-smooth-particle-mesh-Ewald-method).
- 546 58. Guixà-González, R. *et al.* MEMBPLUGIN: studying membrane complexity in VMD. *Bioinformatics*  
547 **30**, 1478–1480 (2014).
- 548 59. Bligh, E. G. & Dyer, W. J. A RAPID METHOD OF TOTAL LIPID EXTRACTION AND PURIFICATION.  
549

550

# Figures

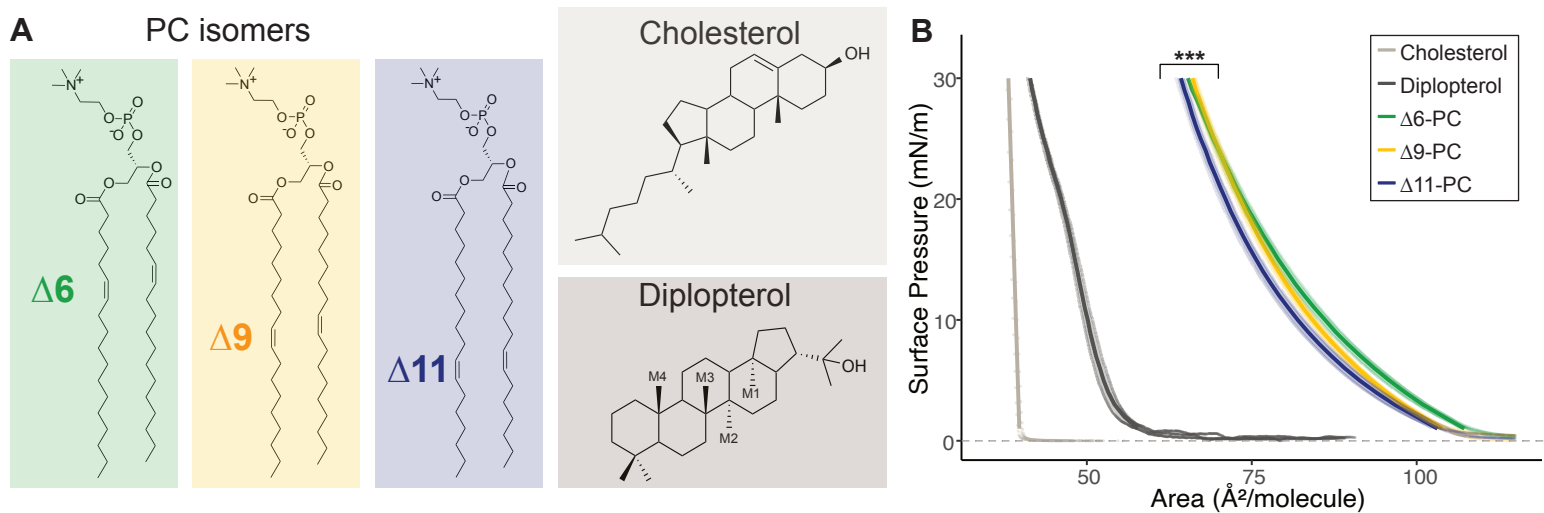

**Fig 1. (A) Chemical structure of di-unsaturated PC isomers, Chol and Dpop and (B) Isotherms of the corresponding lipids at 20 °C, \*\*\* (F=12.4,  $p < 0.0005$ ).**

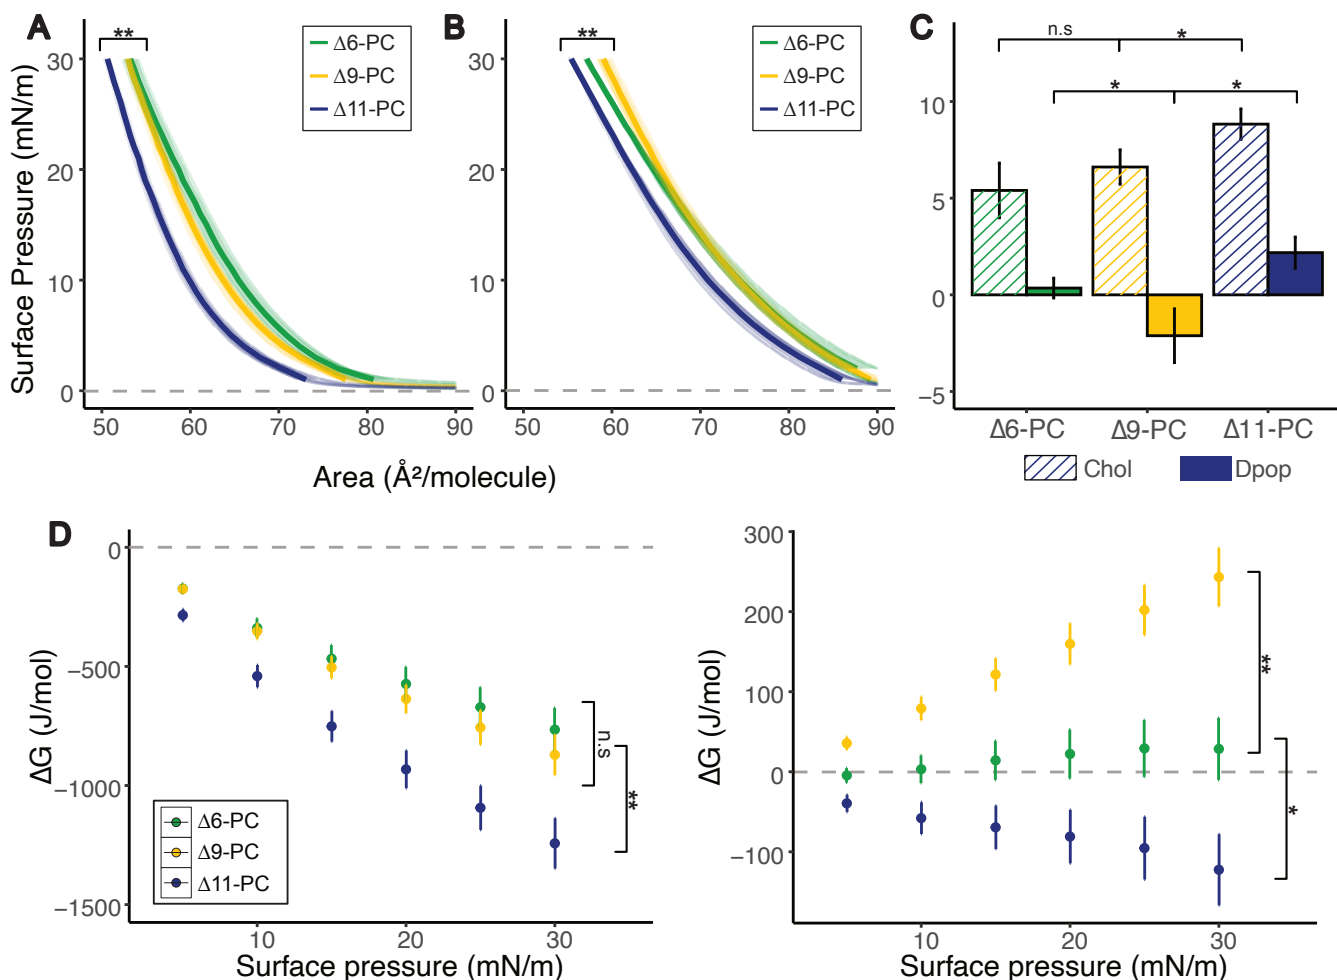

**Fig 2. PC isomers interact differently with Chol and Dpop. While Chol ordering of PC increases as double bond position is shifted further from the headgroup, Dpop only exhibits an ordering effect with  $\Delta 11$ -PC. (A) Isotherms of PC isomers mixed with Chol (2:1) at 20°C. \*\* (F=7.75,  $p < 0.005$ ) manova (B) Isotherms of PC mixture with Dpop (2:1) at 20°C. \*\* (F=8.18,  $p < 0.005$ ) manova (C) Condensing effect of Chol and Dpop calculated the ordering effect on PC isomers at high surface pressure (30 mN/m). Error bar represents standard deviation. n.s ( $p > 0.5$ ) \* ( $p < 0.05$ ) unpaired t-test (D) Energy of interaction ( $\Delta G$ ) of lipid pairs during compression. Error bar represents standard deviation. n.s ( $p > 0.5$ ) \* ( $p < 0.05$ ) \*\* ( $p < 0.005$ ) unpaired t-test.**

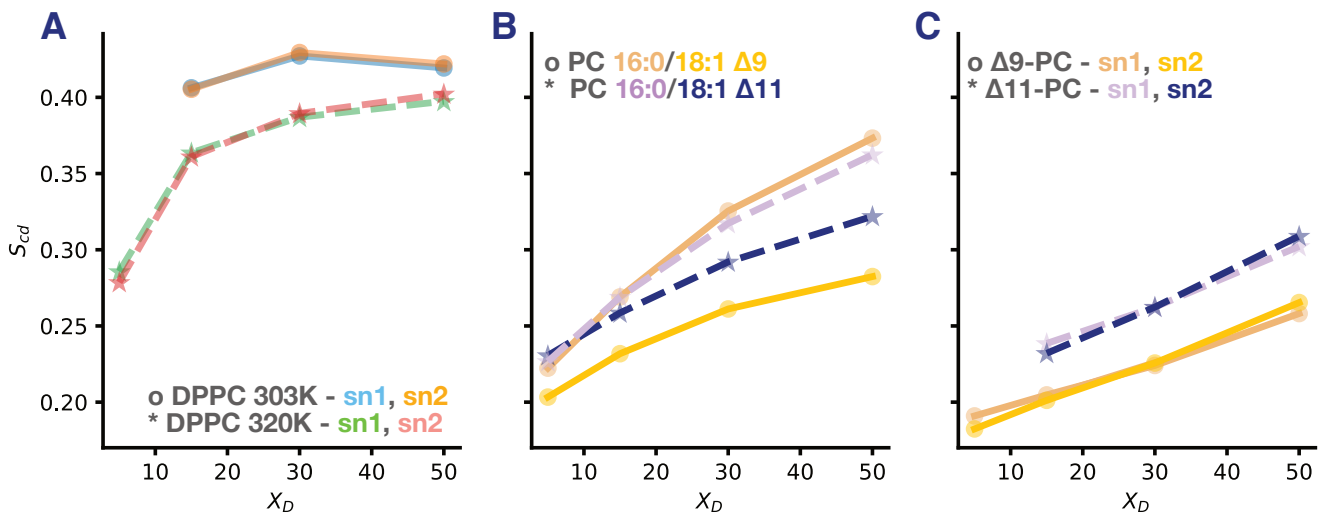

**Fig 3. Molecular dynamic simulations show Dpop orders 18:1  $\Delta 11$  more efficiently than 18:1  $\Delta 9$ .** (A) Dpop ordering effect with saturated DPPC were confirmed by  $S_{CD}$ . (B) Dpop ordered saturated chains most efficiently, then 18:1  $\Delta 11$  and the least for 18:1  $\Delta 9$ . (C) Dpop's ordering effect was similar regardless of sn chain position, but depended on double bond position, with  $\Delta 11$  a greater ordering effect than  $\Delta 9$ .

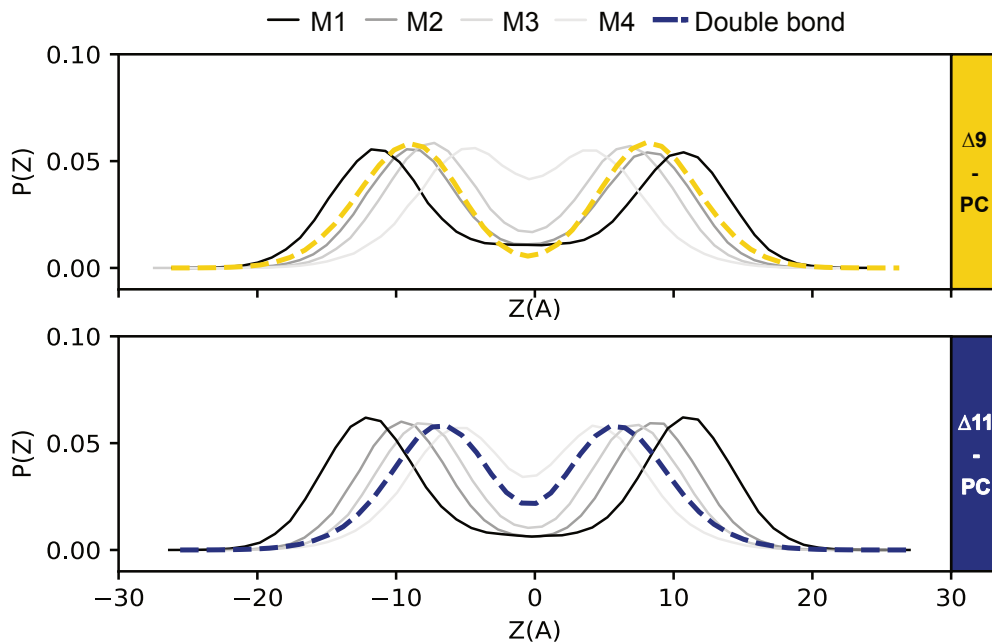

**Fig 4. Overlapping distribution of Dpop's methyl groups and PC's double bond correspond to a reduced ordering effect.** (A) The double bond in  $\Delta 9$ -PC overlaps with Dpop M2, preventing efficient lipid packing. (B) No Dpop methyl group overlap with the double bond of  $\Delta 11$ -PC.

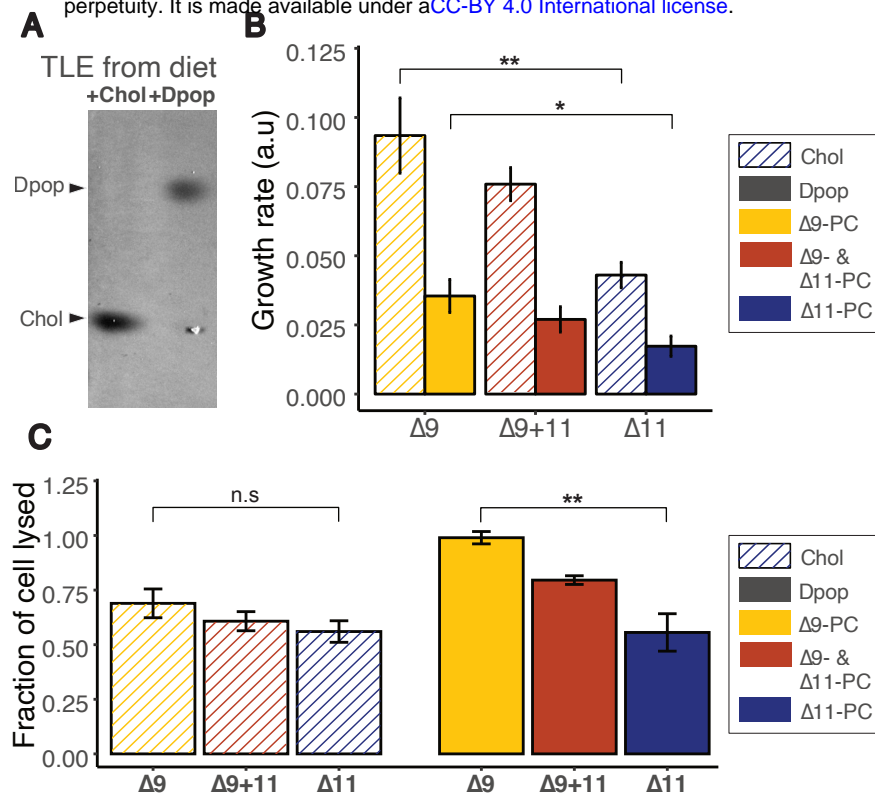

**Fig 5. Dpop and  $\Delta 11$ -PC enhance robustness of *Mesoplasma florum* to hypoosmotic shock compared with Dpop and  $\Delta 9$ -PC.** (A) Chol and Dpop were incorporated into *Mesoplasma* membranes according to their respective diets (B) Growth rate of *M. florum* on different diets. \*\* ( $F=24.4$ ,  $p < 0.005$ ) \* ( $F=10.6$ ,  $p < 0.05$ ) Analysis were performed using one-sided anova with Tukey post hoc test (C) Membrane robustness reflected by the fraction of cell lysed when subjected to hypoosmotic shock. n.s ( $F=1.47$ ,  $p < 0.5$ ) \*\* ( $F=16.6$ ,  $p < 0.005$ ) Analysis were performed using one-sided anova with Tukey post hoc test.
